# Supplementary material for: A cross-sectional study of functional and metabolic changes during aging through the lifespan in male mice
Source: eLife journal article supplement (doi:10.7554/elife.62952), 2021-04-20
Supplement: supp [file elife-62952-supp-v1.zip]

Archive with 13 entries (13 files):
- elife_poa_e62952_Figure_1_figure_supplement_1.tif
- elife_poa_e62952_Figure_2_figure_supplement_1.tif
- elife_poa_e62952_Figure_3_figure_supplement_1.tif
- elife_poa_e62952_Figure_4_figure_supplement_1.tif
- elife_poa_e62952_Figure_6_figure_supplement_1.tif
- elife_poa_e62952_Transparent_Reporting_File.pdf
- elife_poa_e62952_Figure_2_source_data_1.docx
- elife_poa_e62952_Figure_2_source_data_2.docx
- elife_poa_e62952_Figure_2_source_data_3.docx
- elife_poa_e62952_Figure_2_source_data_4.docx
- elife_poa_e62952_Figure_2_source_data_5.docx
- elife_poa_e62952_Figure_6_source_data_1.xlsx
- elife_poa_e62952_Figure_6_source_data_2.docx
