# Supplementary material for: A cross-sectional study of functional and metabolic changes during aging through the lifespan in male mice
Source: eLife journal article supplement (doi:10.7554/elife.62952), 2021-04-20
Supplement: supp [file elife-62952-supp-v1.zip › elife_poa_e62952_Figure_2_source_data_3.docx]

**Figure 2—Source data 3.** Distribution of various energetic parameters in male mice in various age groups.

| Parameter | Age group | mean | SEM | 95% CI |
| --- | --- | --- | --- | --- |
| VO2 (mL/hr) | Young  Adult  Old | 119.1  132.7*  119.9†† | 4.265  2.19  2.442 | 109-129.2  128.1-137.2  114.7-125 |
| VCO2 (mL/hr) | Young  Adult  Old | 102.8  112.9  107.6 | 3.53  1.716  2.58 | 94.5-111.2  109.4-116.5  102.1-113 |
| EE (kcal/hr) | Young  Adult  Old | 0.581  0.647*  0.591†† | 0.0203  0.0096  0.0127 | 0.5328-0.629  0.627-0.667  0.5637-0.6174 |
| Ambulation (counts) | Young  Adult  Old | 450.8  420.7  249.9§,†† | 63.56  42.19  31.77 | 300.5-601.1  332.4-508.4  182.9-316.9 |
|  |  |  |  |  |

*, **, *** p< 0.05, < 0.01, < 0.001 (Adult vs. Young)

†, ††, ††† p< 0.05, < 0.01, < 0.001 (Old vs. Adult)

§, p< 0.05 (Old vs. Young).
