# Supplementary material for: A cross-sectional study of functional and metabolic changes during aging through the lifespan in male mice
Source: eLife journal article supplement (doi:10.7554/elife.62952), 2021-04-20
Supplement: supp [file elife-62952-supp-v1.zip › elife_poa_e62952_Figure_6_source_data_1.xlsx]

## Sheet: Correlation Energ cost-metabol
Metabolites vs Energ Cost	HEART	Metabolites	r	r^2	% determination		LIVER	r	r^2	% determination		SKM	r	r^2	% determination		BRAIN	r	r^2	% determination		SERUM	r	r^2	% determination
		Glucose	-0.1917	0.0367489	3.67489		Glucose	-0.35252	0.12427	12.427		Glucose	0.2724	0.0742018	7.42018		Glucose	-0.10542	0.0111134	1.11134		Glucose	0.04976	0.00247606	0.247606
		Fructose 6P	-0.06326	0.00400183	0.400183		Fructose 6P	0.1463	0.0214037	2.14037		Fructose 6P	0.00301	9.0601e-06	0.00090601		Fructose 6P	-0.32811	0.107656	10.7656		Fructose 6P	0	0	0
		Glucose 6P	0.04986	0.00248602	0.248602		Glucose 6P	-0.10808	0.0116813	1.16813		Glucose 6P	-0.04806	0.00230976	0.230976		Glucose 6P	-0.31526	0.0993889	9.93889		Glucose 6P	0	0	0
		Ribose	0.07104	0.00504668	0.504668		Ribose	-0.29185	0.0851764	8.51764		Ribose	-0.10586	0.0112063	1.12063		Ribose	-0.19596	0.0384003	3.84003		Ribose	0.27398	0.075065	7.5065
		Glucose 1P	-0.23107	0.0533933	5.33933		Glucose 1P	0.10424	0.010866	1.0866		Glucose 1P	-0.11763	0.0138368	1.38368		Glucose 1P	-0.34139	0.116547	11.6547		Glucose 1P	0	0	0
		Pyruvate	-0.06758	0.00456706	0.456706		Pyruvate	-0.31683	0.100381	10.0381		Pyruvate	0	0	0		Pyruvate	0.14344	0.020575	2.0575		Pyruvate	0	0	0
		Palmitic	-0.05113	0.00261428	0.261428		Palmitic	-0.04382	0.00192019	0.192019		Palmitic	-0.09081	0.00824646	0.824646		Palmitic	-0.26353	0.0694481	6.94481		Palmitic	0.40253	0.16203	16.203
		Myristic	-0.18495	0.0342065	3.42065		Myristic	-0.0812	0.00659344	0.659344		Myristic	0.07578	0.00574261	0.574261		Myristic	0.01635	0.000267323	0.0267323		Myristic	0.34043	0.115893	11.5893
		Palmitoleic	-0.33264	0.110649	11.0649		Palmitoleic	-0.33954	0.115287	11.5287		Palmitoleic	0.11407	0.013012	1.3012		Palmitoleic	0.06353	0.00403606	0.403606		Palmitoleic	0.11939	0.014254	1.4254
		Glycerol	-0.07868	0.00619054	0.619054		Glycerol	-0.05121	0.00262246	0.262246		Glycerol	-0.1679	0.0281904	2.81904		Glycerol	0.14799	0.021901	2.1901		Glycerol	-0.33289	0.110816	11.0816
		3-HB	0.14515	0.0210685	2.10685		3-HB	-0.1162	0.0135024	1.35024		3-HB	-0.34538	0.119287	11.9287		3-HB	-0.13351	0.0178249	1.78249		3-HB	-0.05461	0.00298225	0.298225
		Urea	-0.05598	0.00313376	0.313376		Urea	-0.03432	0.00117786	0.117786		Urea	-0.18515	0.0342805	3.42805		Urea	0.03279	0.00107518	0.107518		Urea	-0.11455	0.0131217	1.31217
		Ornithine	0.03554	0.00126309	0.126309		Ornithine	-0.06141	0.00377119	0.377119		Ornithine	0.20694	0.0428242	4.28242		Ornithine	-0.25078	0.0628906	6.28906		Ornithine	0.06167	0.00380319	0.380319
		Alanine	-0.34169	0.116752	11.6752		Alanine	-0.04877	0.00237851	0.237851		Alanine	0.05236	0.00274157	0.274157		Alanine	-0.25579	0.0654285	6.54285		Alanine	0.29385	0.0863478	8.63478
		Leucine	0.07725	0.00596756	0.596756		Leucine	-0.32031	0.102598	10.2598		Leucine	0.15643	0.0244703	2.44703		Leucine	-0.30966	0.0958893	9.58893		Leucine	0.2539	0.0644652	6.44652
		Valine	0.06262	0.00392126	0.392126		Valine	-0.18474	0.0341289	3.41289		Valine	0.10263	0.0105329	1.05329		Valine	-0.26309	0.0692163	6.92163		Valine	0.21436	0.0459502	4.59502
		Isoleucine	0.21625	0.0467641	4.67641		Isoleucine	-0.07234	0.00523308	0.523308		Isoleucine	0.32831	0.107787	10.7787		Isoleucine	-0.08401	0.00705768	0.705768		Isoleucine	0.19877	0.0395095	3.95095
		Glutamate	0.0258	0.00066564	0.066564		Glutamate	0.29467	0.0868304	8.68304		Glutamate	0.44273	0.19601	19.601		Glutamate	-0.34009	0.115661	11.5661		Glutamate	0.1106	0.0122324	1.22324
		Glutamine	-0.14219	0.020218	2.0218		Glutamine	0.15682	0.0245925	2.45925		Glutamine	0.05729	0.00328214	0.328214		Glutamine	-0.29586	0.0875331	8.75331		Glutamine	-0.00686	4.70596e-05	0.00470596
		Cysteine	-0.05936	0.00352361	0.352361		Cysteine	0.07322	0.00536117	0.536117		Cysteine	0.03262	0.00106406	0.106406		Cysteine	-0.21196	0.044927	4.4927		Cysteine	0	0	0
		Glutathione	0.26827	0.0719688	7.19688		Glutathione	0.2008	0.0403206	4.03206		Glutathione	0.05278	0.00278573	0.278573		Glutathione	0	0	0		Glutathione	0	0	0
		Nicotinamide	-0.30521	0.0931531	9.31531		Nicotinamide	-0.12214	0.0149182	1.49182		Nicotinamide	0.0198	0.00039204	0.039204		Nicotinamide	-0.18599	0.0345923	3.45923		Nicotinamide	0.000932954	8.70403e-07	8.70403e-05
		Methionine	-0.09998	0.009996	0.9996		Methionine	-0.22516	0.050697	5.0697		Methionine	-0.07261	0.00527221	0.527221		Methionine	-0.16739	0.0280194	2.80194		Methionine	0	0	0
		Methion. sulfox.	0.16839	0.0283552	2.83552		Methion. sulfox.	0	0	0		Methion. sulfox.	0.15958	0.0254658	2.54658		Methion. sulfox.	-0.36829	0.135638	13.5638		Methion. sulfox.	-0.17569	0.030867	3.0867

## Sheet: Correl RER-metabol
Metabolites vs RER	HEART	Metabolites	r	r^2	% determination		LIVER	r	r^2	% determination		SKM	r	r^2	% determination		BRAIN	r	r^2	% determination		SERUM	r	r^2	% determination
		Glucose	0.41228	0.169975	16.9975		Glucose	-0.22292	0.0496933	4.96933		Glucose	-0.08301	0.00689066	0.689066		Glucose	-0.4413	0.194746	19.4746		Glucose	-0.02284	0.000521666	0.0521666
		Fructose 6P	0.49362	0.243661	24.3661		Fructose 6P	0.22139	0.0490135	4.90135		Fructose 6P	-0.32932	0.108452	10.8452		Fructose 6P	-0.16519	0.0272877	2.72877		Fructose 6P	0	0	0
		Glucose 6P	0.47256	0.223313	22.3313		Glucose 6P	0.08859	0.00784819	0.784819		Glucose 6P	-0.29319	0.0859604	8.59604		Glucose 6P	-0.22032	0.0485409	4.85409		Glucose 6P	0	0	0
		Ribose	-0.12646	0.0159921	1.59921		Ribose	-0.30622	0.0937707	9.37707		Ribose	-0.43727	0.191205	19.1205		Ribose	-0.09848	0.00969831	0.969831		Ribose	-0.01201	0.00014424	0.014424
		Glucose 1P	-0.01206	0.000145444	0.0145444		Glucose 1P	0.15031	0.0225931	2.25931		Glucose 1P	-0.33634	0.113125	11.3125		Glucose 1P	0.29115	0.0847683	8.47683		Glucose 1P	0	0	0
		Pyruvate	-0.15423	0.0237869	2.37869		Pyruvate	-0.17883	0.0319802	3.19802		Pyruvate	-0.55014	0.302654	30.2654		Pyruvate	0.19641	0.0385769	3.85769		Pyruvate	0	0	0
		Palmitic	-0.23079	0.053264	5.3264		Palmitic	-0.20766	0.0431227	4.31227		Palmitic	0.02585	0.000668223	0.0668222		Palmitic	-0.05481	0.00300414	0.300414		Palmitic	0.35177	0.123742	12.3742
		Myristic	-0.46351	0.214842	21.4842		Myristic	-0.08508	0.00723861	0.723861		Myristic	-0.28257	0.0798458	7.98458		Myristic	0.16284	0.0265169	2.65169		Myristic	0.1158	0.0134096	1.34096
		Palmitoleic	-0.32135	0.103266	10.3266		Palmitoleic	-0.13473	0.0181522	1.81522		Palmitoleic	0.10382	0.0107786	1.07786		Palmitoleic	-0.0403	0.00162409	0.162409		Palmitoleic	0.24393	0.0595018	5.95018
		Glycerol	-0.10621	0.0112806	1.12806		Glycerol	-0.12117	0.0146822	1.46822		Glycerol	0.07867	0.00618897	0.618897		Glycerol	0.20481	0.0419471	4.19471		Glycerol	-0.22685	0.0514609	5.14609
		3-HB	-0.09914	0.00982874	0.982874		3-HB	-0.43946	0.193125	19.3125		3-HB	-0.12486	0.01559	1.559		3-HB	0.25119	0.0630964	6.30964		3-HB	-0.3141	0.0986588	9.86588
		Urea	-0.07992	0.00638721	0.638721		Urea	0.09561	0.00914127	0.914127		Urea	0.3083	0.0950489	9.50489		Urea	-0.00111	1.2321e-06	0.00012321		Urea	0.17852	0.0318694	3.18694
		Ornithine	-0.20887	0.0436267	4.36267		Ornithine	-0.41597	0.173031	17.3031		Ornithine	-0.01707	0.000291385	0.0291385		Ornithine	-0.21438	0.0459588	4.59588		Ornithine	0.35157	0.123601	12.3601
		Alanine	-0.10165	0.0103327	1.03327		Alanine	-0.07406	0.00548488	0.548488		Alanine	-0.08837	0.00780926	0.780926		Alanine	0.03434	0.00117924	0.117924		Alanine	0.218	0.047524	4.7524
		Leucine	-0.28827	0.0830996	8.30996		Leucine	-0.22202	0.0492929	4.92929		Leucine	-0.04528	0.00205028	0.205028		Leucine	0.00517	2.67289e-05	0.00267289		Leucine	0.32267	0.104116	10.4116
		Valine	-0.39239	0.15397	15.397		Valine	-0.31922	0.101901	10.1901		Valine	-0.05655	0.0031979	0.31979		Valine	0.05876	0.00345274	0.345274		Valine	-0.05099	0.00259998	0.259998
		Isoleucine	-0.38026	0.144598	14.4598		Isoleucine	-0.05265	0.00277202	0.277202		Isoleucine	0.17225	0.0296701	2.96701		Isoleucine	-0.00238	5.6644e-06	0.00056644		Isoleucine	-0.07933	0.00629325	0.629325
		Glutamate	-0.11457	0.0131263	1.31263		Glutamate	0.06388	0.00408065	0.408065		Glutamate	0.06839	0.00467719	0.467719		Glutamate	-0.06987	0.00488182	0.488182		Glutamate	-0.20981	0.0440202	4.40202
		Glutamine	-0.08737	0.00763352	0.763352		Glutamine	0.03696	0.00136604	0.136604		Glutamine	0.04702	0.00221088	0.221088		Glutamine	-0.04722	0.00222973	0.222973		Glutamine	0.01213	0.000147137	0.0147137
		Cysteine	-0.42235	0.17838	17.838		Cysteine	-0.16976	0.0288185	2.88185		Cysteine	-0.1727	0.0298253	2.98253		Cysteine	0.01773	0.000314353	0.0314353		Cysteine	0	0	0
		Glutathione	-0.05034	0.00253412	0.253412		Glutathione	-0.39481	0.155875	15.5875		Glutathione	-0.06573	0.00432043	0.432043		Glutathione	0.13778	0.0189833	1.89833		Glutathione	0.07356	0.00541107	0.541107
		Nicotinamide	-0.08594	0.00738568	0.738568		Nicotinamide	0.36106	0.130364	13.0364		Nicotinamide	0.02825	0.000798063	0.0798063		Nicotinamide	0.26092	0.0680792	6.80792		Nicotinamide	0	0	0
		Methionine	0.1191	0.0141848	1.41848		Methionine	-0.13119	0.0172108	1.72108		Methionine	0.12115	0.0146773	1.46773		Methionine	0.3298	0.108768	10.8768		Methionine	0	0	0
		Methion. sulfox.	-0.02403	0.000577441	0.0577441		Methion. sulfox.	0	0	0		Methion. sulfox.	0.19223	0.0369524	3.69524		Methion. sulfox.	-0.39893	0.159145	15.9145		Methion. sulfox.	-0.08477	0.00718595	0.718595

## Sheet: Correl FI-metabol
Metabolites vs FI	HEART	Metabolites	r	r^2	% determination		LIVER	r	r^2	% determination		SKM	r	r^2	% determination		BRAIN	r	r^2	% determination		SERUM	r	r^2	% determination
		Glucose	-0.16133	0.0260274	2.60274		Glucose	-0.26973	0.0727543	7.27543		Glucose	-0.07537	0.00568064	0.568064		Glucose	0.07142	0.00510082	0.510082		Glucose	-0.4501	0.20259	20.259
		Fructose 6P	-0.01961	0.000384552	0.0384552		Fructose 6P	0.49213	0.242192	24.2192		Fructose 6P	-0.322	0.103684	10.3684		Fructose 6P	0.0504	0.00254016	0.254016		Fructose 6P	0	0	0
		Glucose 6P	-0.11371	0.01293	1.293		Glucose 6P	0.32696	0.106903	10.6903		Glucose 6P	-0.25694	0.0660182	6.60182		Glucose 6P	0.04971	0.00247108	0.247108		Glucose 6P	0	0	0
		Ribose	-0.09552	0.00912407	0.912407		Ribose	0.0071	5.041e-05	0.005041		Ribose	-0.09607	0.00922944	0.922944		Ribose	-0.2365	0.0559322	5.59322		Ribose	-0.42427	0.180005	18.0005
		Glucose 1P	-0.55339	0.30624	30.624		Glucose 1P	-0.0616	0.00379456	0.379456		Glucose 1P	-0.12817	0.0164275	1.64275		Glucose 1P	-0.05552	0.00308247	0.308247		Glucose 1P	0	0	0
		Pyruvate	0.0383	0.00146689	0.146689		Pyruvate	-0.44023	0.193802	19.3802		Pyruvate	-0.84087	0.707062	70.7062		Pyruvate	0.16073	0.0258341	2.58341		Pyruvate	0	0	0
		Palmitic	-0.08049	0.00647864	0.647864		Palmitic	0.3298	0.108768	10.8768		Palmitic	-0.11724	0.0137452	1.37452		Palmitic	-0.00869	7.55161e-05	0.00755161		Palmitic	-0.10905	0.0118919	1.18919
		Myristic	-0.05068	0.00256846	0.256846		Myristic	0.18571	0.0344882	3.44882		Myristic	-0.23317	0.0543682	5.43682		Myristic	0.24516	0.0601034	6.01034		Myristic	-0.13855	0.0191961	1.91961
		Palmitoleic	-0.02864	0.00082025	0.082025		Palmitoleic	-0.12046	0.0145106	1.45106		Palmitoleic	0.22687	0.05147	5.147		Palmitoleic	0.11462	0.0131377	1.31377		Palmitoleic	-0.22749	0.0517517	5.17517
		Glycerol	0.0145	0.00021025	0.021025		Glycerol	0.03988	0.00159041	0.159041		Glycerol	-0.28324	0.0802249	8.02249		Glycerol	-0.17262	0.0297977	2.97977		Glycerol	-0.4213	0.177494	17.7494
		3-HB	-0.07815	0.00610742	0.610742		3-HB	0.03389	0.00114853	0.114853		3-HB	-0.01064	0.00011321	0.011321		3-HB	0.06965	0.00485112	0.485112		3-HB	-0.19613	0.038467	3.8467
		Urea	0.25465	0.0648466	6.48466		Urea	-0.03126	0.000977188	0.0977188		Urea	0.3521	0.123974	12.3974		Urea	0.27275	0.0743926	7.43926		Urea	0.35262	0.124341	12.4341
		Ornithine	-0.02731	0.000745836	0.0745836		Ornithine	0.04685	0.00219492	0.219492		Ornithine	-0.11993	0.0143832	1.43832		Ornithine	0.00998	9.96004e-05	0.00996004		Ornithine	0.04146	0.00171893	0.171893
		Alanine	-0.20091	0.0403648	4.03648		Alanine	0.12514	0.01566	1.566		Alanine	0.19375	0.0375391	3.75391		Alanine	0.06475	0.00419256	0.419256		Alanine	-0.06862	0.0047087	0.47087
		Leucine	0.39968	0.159744	15.9744		Leucine	-0.30553	0.0933486	9.33486		Leucine	-0.26389	0.0696379	6.96379		Leucine	-0.02226	0.000495508	0.0495508		Leucine	0.4814	0.231746	23.1746
		Valine	0.32421	0.105112	10.5112		Valine	-0.242	0.058564	5.8564		Valine	-0.26793	0.0717865	7.17865		Valine	0.11771	0.0138556	1.38556		Valine	0.17668	0.0312158	3.12158
		Isoleucine	0.35795	0.128128	12.8128		Isoleucine	-0.00593	3.51649e-05	0.00351649		Isoleucine	-0.21616	0.0467251	4.67251		Isoleucine	0.12197	0.0148767	1.48767		Isoleucine	0.21197	0.0449313	4.49313
		Glutamate	-0.02752	0.00075735	0.075735		Glutamate	0.18765	0.0352125	3.52125		Glutamate	0.28403	0.080673	8.0673		Glutamate	-0.16345	0.0267159	2.67159		Glutamate	-0.31057	0.0964537	9.64537
		Glutamine	0.03107	0.000965345	0.0965345		Glutamine	0.30081	0.0904867	9.04867		Glutamine	0.19242	0.0370255	3.70255		Glutamine	0.30588	0.0935626	9.35626		Glutamine	0.08422	0.00709301	0.709301
		Cysteine	0.23678	0.0560648	5.60648		Cysteine	-0.19962	0.0398481	3.98481		Cysteine	-0.29743	0.0884646	8.84646		Cysteine	0.02026	0.000410468	0.0410468		Cysteine	0	0	0
		Glutathione	0.28821	0.083065	8.3065		Glutathione	-0.06608	0.00436657	0.436657		Glutathione	0.29774	0.0886491	8.86491		Glutathione	-0.07541	0.00568667	0.568667		Glutathione	0.03357	0.00112694	0.112694
		Nicotinamide	-0.22385	0.0501088	5.01088		Nicotinamide	0.38723	0.149947	14.9947		Nicotinamide	-0.01166	0.000135956	0.0135956		Nicotinamide	0	0	0		Nicotinamide	0	0	0
		Methionine	-0.03967	0.00157371	0.157371		Methionine	-0.19467	0.0378964	3.78964		Methionine	-0.39548	0.156404	15.6404		Methionine	0.03281	0.0010765	0.10765		Methionine	0	0	0
		Methion. sulfox.	0.52698	0.277708	27.7708		Methion. sulfox.	0	0	0		Methion. sulfox.	-0.07079	0.00501122	0.501122		Methion. sulfox.	-0.23809	0.0566868	5.66868		Methion. sulfox.	0.23383	0.0546765	5.46765

## Sheet:  Sorting Energ Cost-Metabol
Metabolites vs Energ Cost	HEART	Metabolites	r	r^2	% determination		LIVER	r	r^2	% determination		SKM	r	r^2	% determination		BRAIN	r	r^2	% determination		SERUM	r	r^2	% determination
		Alanine	-0.34169	0.116752	11.6752		Glucose	-0.35252	0.12427	12.427		Glutamate	0.44273	0.19601	19.601		Methion. sulfox.	-0.36829	0.135638	13.5638		Palmitic	0.40253	0.16203	16.203
		Palmitoleic	-0.33264	0.110649	11.0649		Palmitoleic	-0.33954	0.115287	11.5287		3-HB	-0.34538	0.119287	11.9287		Glucose 1P	-0.34139	0.116547	11.6547		Myristic	0.34043	0.115893	11.5893
		Nicotinamide	-0.30521	0.0931531	9.31531		Leucine	-0.32031	0.102598	10.2598		Isoleucine	0.32831	0.107787	10.7787		Glutamate	-0.34009	0.115661	11.5661		Glycerol	-0.33289	0.110816	11.0816
		Glutathione	0.26827	0.0719688	7.19688		Pyruvate	-0.31683	0.100381	10.0381		Glucose	0.2724	0.0742018	7.42018		Fructose 6P	-0.32811	0.107656	10.7656		Alanine	0.29385	0.0863478	8.63478
		Glucose 1P	-0.23107	0.0533933	5.33933		Glutamate	0.29467	0.0868304	8.68304		Ornithine	0.20694	0.0428242	4.28242		Glucose 6P	-0.31526	0.0993889	9.93889		Ribose	0.27398	0.075065	7.5065
		Isoleucine	0.21625	0.0467641	4.67641		Ribose	-0.29185	0.0851764	8.51764		Urea	-0.18515	0.0342805	3.42805		Leucine	-0.30966	0.0958893	9.58893		Leucine	0.2539	0.0644652	6.44652
		Glucose	-0.1917	0.0367489	3.67489		Methionine	-0.22516	0.050697	5.0697		Glycerol	-0.1679	0.0281904	2.81904		Glutamine	-0.29586	0.0875331	8.75331		Valine	0.21436	0.0459502	4.59502
		Myristic	-0.18495	0.0342065	3.42065		Glutathione	0.2008	0.0403206	4.03206		Methion. sulfox.	0.15958	0.0254658	2.54658		Palmitic	-0.26353	0.0694481	6.94481		Isoleucine	0.19877	0.0395095	3.95095
		Methion. sulfox.	0.16839	0.0283552	2.83552		Valine	-0.18474	0.0341289	3.41289		Leucine	0.15643	0.0244703	2.44703		Valine	-0.26309	0.0692163	6.92163		Methion. sulfox.	-0.17569	0.030867	3.0867
		3-HB	0.14515	0.0210685	2.10685		Glutamine	0.15682	0.0245925	2.45925		Glucose 1P	-0.11763	0.0138368	1.38368		Alanine	-0.25579	0.0654285	6.54285		Palmitoleic	0.11939	0.014254	1.4254
		Glutamine	-0.14219	0.020218	2.0218		Fructose 6P	0.1463	0.0214037	2.14037		Palmitoleic	0.11407	0.013012	1.3012		Ornithine	-0.25078	0.0628906	6.28906		Urea	-0.11455	0.0131217	1.31217
		Methionine	-0.09998	0.009996	0.9996		Nicotinamide	-0.12214	0.0149182	1.49182		Ribose	-0.10586	0.0112063	1.12063		Cysteine	-0.21196	0.044927	4.4927		Glutamate	0.1106	0.0122324	1.22324
		Glycerol	-0.07868	0.00619054	0.619054		3-HB	-0.1162	0.0135024	1.35024		Valine	0.10263	0.0105329	1.05329		Ribose	-0.19596	0.0384003	3.84003		Ornithine	0.06167	0.00380319	0.380319
		Leucine	0.07725	0.00596756	0.596756		Glucose 6P	-0.10808	0.0116813	1.16813		Palmitic	-0.09081	0.00824646	0.824646		Nicotinamide	-0.18599	0.0345923	3.45923		3-HB	-0.05461	0.00298225	0.298225
		Ribose	0.07104	0.00504668	0.504668		Glucose 1P	0.10424	0.010866	1.0866		Myristic	0.07578	0.00574261	0.574261		Methionine	-0.16739	0.0280194	2.80194		Glucose	0.04976	0.00247606	0.247606
		Pyruvate	-0.06758	0.00456706	0.456706		Myristic	-0.0812	0.00659344	0.659344		Methionine	-0.07261	0.00527221	0.527221		Glycerol	0.14799	0.021901	2.1901		Glutamine	-0.00686	4.70596e-05	0.00470596
		Fructose 6P	-0.06326	0.00400183	0.400183		Cysteine	0.07322	0.00536117	0.536117		Glutamine	0.05729	0.00328214	0.328214		Pyruvate	0.14344	0.020575	2.0575		Nicotinamide	0.000932954	8.70403e-07	8.70403e-05
		Valine	0.06262	0.00392126	0.392126		Isoleucine	-0.07234	0.00523308	0.523308		Glutathione	0.05278	0.00278573	0.278573		3-HB	-0.13351	0.0178249	1.78249		Fructose 6P	0	0	0
		Cysteine	-0.05936	0.00352361	0.352361		Ornithine	-0.06141	0.00377119	0.377119		Alanine	0.05236	0.00274157	0.274157		Glucose	-0.10542	0.0111134	1.11134		Glucose 6P	0	0	0
		Urea	-0.05598	0.00313376	0.313376		Glycerol	-0.05121	0.00262246	0.262246		Glucose 6P	-0.04806	0.00230976	0.230976		Isoleucine	-0.08401	0.00705768	0.705768		Glucose 1P	0	0	0
		Palmitic	-0.05113	0.00261428	0.261428		Alanine	-0.04877	0.00237851	0.237851		Cysteine	0.03262	0.00106406	0.106406		Palmitoleic	0.06353	0.00403606	0.403606		Pyruvate	0	0	0
		Glucose 6P	0.04986	0.00248602	0.248602		Palmitic	-0.04382	0.00192019	0.192019		Nicotinamide	0.0198	0.00039204	0.039204		Urea	0.03279	0.00107518	0.107518		Cysteine	0	0	0
		Ornithine	0.03554	0.00126309	0.126309		Urea	-0.03432	0.00117786	0.117786		Fructose 6P	0.00301	9.0601e-06	0.00090601		Myristic	0.01635	0.000267323	0.0267323		Glutathione	0	0	0
		Glutamate	0.0258	0.00066564	0.066564		Methion. sulfox.	0	0	0		Pyruvate	0	0	0		Glutathione	0	0	0		Methionine	0	0	0

## Sheet: Sorting RER-Metabol
Metabolites vs RER	HEART	Metabolites	r	r^2	% determination		LIVER	r	r^2	% determination		SKM	r	r^2	% determination		BRAIN	r	r^2	% determination		SERUM	r	r^2	% determination
		Fructose 6P	0.49362	0.243661	24.3661		3-HB	-0.43946	0.193125	19.3125		Pyruvate	-0.55014	0.302654	30.2654		Glucose	-0.4413	0.194746	19.4746		Palmitic	0.35177	0.123742	12.3742
		Glucose 6P	0.47256	0.223313	22.3313		Ornithine	-0.41597	0.173031	17.3031		Ribose	-0.43727	0.191205	19.1205		Methion. sulfox.	-0.39893	0.159145	15.9145		Ornithine	0.35157	0.123601	12.3601
		Myristic	-0.46351	0.214842	21.4842		Glutathione	-0.39481	0.155875	15.5875		Glucose 1P	-0.33634	0.113125	11.3125		Methionine	0.3298	0.108768	10.8768		Leucine	0.32267	0.104116	10.4116
		Cysteine	-0.42235	0.17838	17.838		Nicotinamide	0.36106	0.130364	13.0364		Fructose 6P	-0.32932	0.108452	10.8452		Glucose 1P	0.29115	0.0847683	8.47683		3-HB	-0.3141	0.0986588	9.86588
		Glucose	0.41228	0.169975	16.9975		Valine	-0.31922	0.101901	10.1901		Urea	0.3083	0.0950489	9.50489		Nicotinamide	0.26092	0.0680792	6.80792		Palmitoleic	0.24393	0.0595018	5.95018
		Valine	-0.39239	0.15397	15.397		Ribose	-0.30622	0.0937707	9.37707		Glucose 6P	-0.29319	0.0859604	8.59604		3-HB	0.25119	0.0630964	6.30964		Glycerol	-0.22685	0.0514609	5.14609
		Isoleucine	-0.38026	0.144598	14.4598		Glucose	-0.22292	0.0496933	4.96933		Myristic	-0.28257	0.0798458	7.98458		Glucose 6P	-0.22032	0.0485409	4.85409		Alanine	0.218	0.047524	4.7524
		Palmitoleic	-0.32135	0.103266	10.3266		Leucine	-0.22202	0.0492929	4.92929		Methion. sulfox.	0.19223	0.0369524	3.69524		Ornithine	-0.21438	0.0459588	4.59588		Glutamate	-0.20981	0.0440202	4.40202
		Leucine	-0.28827	0.0830996	8.30996		Fructose 6P	0.22139	0.0490135	4.90135		Cysteine	-0.1727	0.0298253	2.98253		Glycerol	0.20481	0.0419471	4.19471		Urea	0.17852	0.0318694	3.18694
		Palmitic	-0.23079	0.053264	5.3264		Palmitic	-0.20766	0.0431227	4.31227		Isoleucine	0.17225	0.0296701	2.96701		Pyruvate	0.19641	0.0385769	3.85769		Myristic	0.1158	0.0134096	1.34096
		Ornithine	-0.20887	0.0436267	4.36267		Pyruvate	-0.17883	0.0319802	3.19802		3-HB	-0.12486	0.01559	1.559		Fructose 6P	-0.16519	0.0272877	2.72877		Methion. sulfox.	-0.08477	0.00718595	0.718595
		Pyruvate	-0.15423	0.0237869	2.37869		Cysteine	-0.16976	0.0288185	2.88185		Methionine	0.12115	0.0146773	1.46773		Myristic	0.16284	0.0265169	2.65169		Isoleucine	-0.07933	0.00629325	0.629325
		Ribose	-0.12646	0.0159921	1.59921		Glucose 1P	0.15031	0.0225931	2.25931		Palmitoleic	0.10382	0.0107786	1.07786		Glutathione	0.13778	0.0189833	1.89833		Glutathione	0.07356	0.00541107	0.541107
		Methionine	0.1191	0.0141848	1.41848		Palmitoleic	-0.13473	0.0181522	1.81522		Alanine	-0.08837	0.00780926	0.780926		Ribose	-0.09848	0.00969831	0.969831		Valine	-0.05099	0.00259998	0.259998
		Glutamate	-0.11457	0.0131263	1.31263		Methionine	-0.13119	0.0172108	1.72108		Glucose	-0.08301	0.00689066	0.689066		Glutamate	-0.06987	0.00488182	0.488182		Glucose	-0.02284	0.000521666	0.0521666
		Glycerol	-0.10621	0.0112806	1.12806		Glycerol	-0.12117	0.0146822	1.46822		Glycerol	0.07867	0.00618897	0.618897		Valine	0.05876	0.00345274	0.345274		Glutamine	0.01213	0.000147137	0.0147137
		Alanine	-0.10165	0.0103327	1.03327		Urea	0.09561	0.00914127	0.914127		Glutamate	0.06839	0.00467719	0.467719		Palmitic	-0.05481	0.00300414	0.300414		Ribose	-0.01201	0.00014424	0.014424
		3-HB	-0.09914	0.00982874	0.982874		Glucose 6P	0.08859	0.00784819	0.784819		Glutathione	-0.06573	0.00432043	0.432043		Glutamine	-0.04722	0.00222973	0.222973		Fructose 6P	0	0	0
		Glutamine	-0.08737	0.00763352	0.763352		Myristic	-0.08508	0.00723861	0.723861		Valine	-0.05655	0.0031979	0.31979		Palmitoleic	-0.0403	0.00162409	0.162409		Glucose 6P	0	0	0
		Nicotinamide	-0.08594	0.00738568	0.738568		Alanine	-0.07406	0.00548488	0.548488		Glutamine	0.04702	0.00221088	0.221088		Alanine	0.03434	0.00117924	0.117924		Glucose 1P	0	0	0
		Urea	-0.07992	0.00638721	0.638721		Glutamate	0.06388	0.00408065	0.408065		Leucine	-0.04528	0.00205028	0.205028		Cysteine	0.01773	0.000314353	0.0314353		Pyruvate	0	0	0
		Glutathione	-0.05034	0.00253412	0.253412		Isoleucine	-0.05265	0.00277202	0.277202		Nicotinamide	0.02825	0.000798063	0.0798063		Leucine	0.00517	2.67289e-05	0.00267289		Cysteine	0	0	0
		Methion. sulfox.	-0.02403	0.000577441	0.0577441		Glutamine	0.03696	0.00136604	0.136604		Palmitic	0.02585	0.000668223	0.0668222		Isoleucine	-0.00238	5.6644e-06	0.00056644		Nicotinamide	0	0	0
		Glucose 1P	-0.01206	0.000145444	0.0145444		Methion. sulfox.	0	0	0		Ornithine	-0.01707	0.000291385	0.0291385		Urea	-0.00111	1.2321e-06	0.00012321		Methionine	0	0	0

## Sheet: Sorting FI-Metabol
Metabolites vs FI	HEART	Metabolites	r	r^2	% determination		LIVER	r	r^2	% determination		SKM	r	r^2	% determination		BRAIN	r	r^2	% determination		SERUM	r	r^2	% determination
		Glucose 1P	-0.55339	0.30624	30.624		Fructose 6P	0.49213	0.242192	24.2192		Pyruvate	-0.84087	0.707062	70.7062		Glutamine	0.30588	0.0935626	9.35626		Leucine	0.4814	0.231746	23.1746
		Methion. sulfox.	0.52698	0.277708	27.7708		Pyruvate	-0.44023	0.193802	19.3802		Methionine	-0.39548	0.156404	15.6404		Urea	0.27275	0.0743926	7.43926		Glucose	-0.4501	0.20259	20.259
		Leucine	0.39968	0.159744	15.9744		Nicotinamide	0.38723	0.149947	14.9947		Urea	0.3521	0.123974	12.3974		Myristic	0.24516	0.0601034	6.01034		Ribose	-0.42427	0.180005	18.0005
		Isoleucine	0.35795	0.128128	12.8128		Palmitic	0.3298	0.108768	10.8768		Fructose 6P	-0.322	0.103684	10.3684		Methion. sulfox.	-0.23809	0.0566868	5.66868		Glycerol	-0.4213	0.177494	17.7494
		Valine	0.32421	0.105112	10.5112		Glucose 6P	0.32696	0.106903	10.6903		Glutathione	0.29774	0.0886491	8.86491		Ribose	-0.2365	0.0559322	5.59322		Urea	0.35262	0.124341	12.4341
		Glutathione	0.28821	0.083065	8.3065		Leucine	-0.30553	0.0933486	9.33486		Cysteine	-0.29743	0.0884646	8.84646		Glycerol	-0.17262	0.0297977	2.97977		Glutamate	-0.31057	0.0964537	9.64537
		Urea	0.25465	0.0648466	6.48466		Glutamine	0.30081	0.0904867	9.04867		Glutamate	0.28403	0.080673	8.0673		Glutamate	-0.16345	0.0267159	2.67159		Methion. sulfox.	0.23383	0.0546765	5.46765
		Cysteine	0.23678	0.0560648	5.60648		Glucose	-0.26973	0.0727543	7.27543		Glycerol	-0.28324	0.0802249	8.02249		Pyruvate	0.16073	0.0258341	2.58341		Palmitoleic	-0.22749	0.0517517	5.17517
		Nicotinamide	-0.22385	0.0501088	5.01088		Valine	-0.242	0.058564	5.8564		Valine	-0.26793	0.0717865	7.17865		Isoleucine	0.12197	0.0148767	1.48767		Isoleucine	0.21197	0.0449313	4.49313
		Alanine	-0.20091	0.0403648	4.03648		Cysteine	-0.19962	0.0398481	3.98481		Leucine	-0.26389	0.0696379	6.96379		Valine	0.11771	0.0138556	1.38556		3-HB	-0.19613	0.038467	3.8467
		Glucose	-0.16133	0.0260274	2.60274		Methionine	-0.19467	0.0378964	3.78964		Glucose 6P	-0.25694	0.0660182	6.60182		Palmitoleic	0.11462	0.0131377	1.31377		Valine	0.17668	0.0312158	3.12158
		Glucose 6P	-0.11371	0.01293	1.293		Glutamate	0.18765	0.0352125	3.52125		Myristic	-0.23317	0.0543682	5.43682		Glutathione	-0.07541	0.00568667	0.568667		Myristic	-0.13855	0.0191961	1.91961
		Ribose	-0.09552	0.00912407	0.912407		Myristic	0.18571	0.0344882	3.44882		Palmitoleic	0.22687	0.05147	5.147		Glucose	0.07142	0.00510082	0.510082		Palmitic	-0.10905	0.0118919	1.18919
		Palmitic	-0.08049	0.00647864	0.647864		Alanine	0.12514	0.01566	1.566		Isoleucine	-0.21616	0.0467251	4.67251		3-HB	0.06965	0.00485112	0.485112		Glutamine	0.08422	0.00709301	0.709301
		3-HB	-0.07815	0.00610742	0.610742		Palmitoleic	-0.12046	0.0145106	1.45106		Alanine	0.19375	0.0375391	3.75391		Alanine	0.06475	0.00419256	0.419256		Alanine	-0.06862	0.0047087	0.47087
		Myristic	-0.05068	0.00256846	0.256846		Glutathione	-0.06608	0.00436657	0.436657		Glutamine	0.19242	0.0370255	3.70255		Glucose 1P	-0.05552	0.00308247	0.308247		Ornithine	0.04146	0.00171893	0.171893
		Methionine	-0.03967	0.00157371	0.157371		Glucose 1P	-0.0616	0.00379456	0.379456		Glucose 1P	-0.12817	0.0164275	1.64275		Fructose 6P	0.0504	0.00254016	0.254016		Glutathione	0.03357	0.00112694	0.112694
		Pyruvate	0.0383	0.00146689	0.146689		Ornithine	0.04685	0.00219492	0.219492		Ornithine	-0.11993	0.0143832	1.43832		Glucose 6P	0.04971	0.00247108	0.247108		Fructose 6P	0	0	0
		Glutamine	0.03107	0.000965345	0.0965345		Glycerol	0.03988	0.00159041	0.159041		Palmitic	-0.11724	0.0137452	1.37452		Methionine	0.03281	0.0010765	0.10765		Glucose 6P	0	0	0
		Palmitoleic	-0.02864	0.00082025	0.082025		3-HB	0.03389	0.00114853	0.114853		Ribose	-0.09607	0.00922944	0.922944		Leucine	-0.02226	0.000495508	0.0495508		Glucose 1P	0	0	0
		Glutamate	-0.02752	0.00075735	0.075735		Urea	-0.03126	0.000977188	0.0977188		Glucose	-0.07537	0.00568064	0.568064		Cysteine	0.02026	0.000410468	0.0410468		Pyruvate	0	0	0
		Ornithine	-0.02731	0.000745836	0.0745836		Ribose	0.0071	5.041e-05	0.005041		Methion. sulfox.	-0.07079	0.00501122	0.501122		Ornithine	0.00998	9.96004e-05	0.00996004		Cysteine	0	0	0
		Fructose 6P	-0.01961	0.000384552	0.0384552		Isoleucine	-0.00593	3.51649e-05	0.00351649		Nicotinamide	-0.01166	0.000135956	0.0135956		Palmitic	-0.00869	7.55161e-05	0.00755161		Nicotinamide	0	0	0
		Glycerol	0.0145	0.00021025	0.021025		Methion. sulfox.	0	0	0		3-HB	-0.01064	0.00011321	0.011321		Nicotinamide	0	0	0		Methionine	0	0	0
