# Supplementary material for: A cross-sectional study of functional and metabolic changes during aging through the lifespan in male mice
Source: eLife journal article supplement (doi:10.7554/elife.62952), 2021-04-20
Supplement: supp [file elife-62952-supp-v1.zip › elife_poa_e62952_Figure_6_source_data_2.docx]

**Figure 6—Source data 2.** List of top genes significantly impacted by 20% CR versus AL controls in the liver of male C57BL/6J mice at 24 months of age.

| Accession | Gene name | CR20-AL  Zratio |
| --- | --- | --- |
| | NM_016974.1 | | | --- | --- | | NM_198091.1 | | | NM_001033302.1 | | | NM_007812.1 | | | NM_011066.1 | | | NM_053078.3 | | | NM_134246.2 | | | NM_017376.2 | | | NM_001039710.1 | | | NM_029692.1 | | | NM_008295.1 | | | NM_009834.1 | | | NM_008898.1 | | | NM_008647.3 | | | NR_002861.1 | | | NM_008685.2 | | NM_023154.2 | | NM_178389.2 | | NM_010000.1 | | NM_007669.2 | | NM_013650.1 | | NM_146119.1 | | NM_026301.1 | | NM_011575.1 | | NM_007813.1 | | NM_015730.4 | | NM_011178.2 | | NM_177388.2 | | NM_008509.1 | | NM_178082.2 | | NM_007474.1 | | NM_133903.2 | | | DBP | | --- | | USP2 | | GM129 | | CYP2A5 | | PER2 | | D0H4S114 | | PTE2A | | TEF | | COQ10B | | UPP2 | | HSD3B5 | | CCRN4L | | POR | | MUP2 | | SERPINA4-PS1 | | NFE2 | | ETHE1 | | GALE | | CYP2B9 | | CDKN1A | | S100A8 | | 9130404D14RIK | | RNF125 | | TFF3 | | CYP2B13 | | CHRNA4 | | PRTN3 | | SLC41A2 | | LPL | | INSIG2 | | AQP8 | | SPON2 | | | 16.005 | | --- | | 15.983 | | 9.168 | | 8.790 | | 8.605 | | 8.552 | | 8.380 | | 7.597 | | 7.449 | | 7.445 | | 7.081 | | 6.949 | | 6.805 | | 6.618 | | 6.331 | | -6.947 | | -7.107 | | -7.140 | | -7.205 | | -7.307 | | -7.582 | | -7.773 | | -8.048 | | -8.225 | | -8.390 | | -8.414 | | -8.494 | | -9.435 | | -10.006 | | -11.736 | | -12.091 | | -12.296 | |

Significance defined by the z-test < 0.05, false discovery rate < 0.30, as well as z-ratio > 1.5 in both directions and ANOVA p value < 0.05.
