# Supplementary figures and images for: A cross-sectional study of functional and metabolic changes during aging through the lifespan in male mice
Source: eLife journal article supplement (doi:10.7554/elife.62952), 2021-04-20

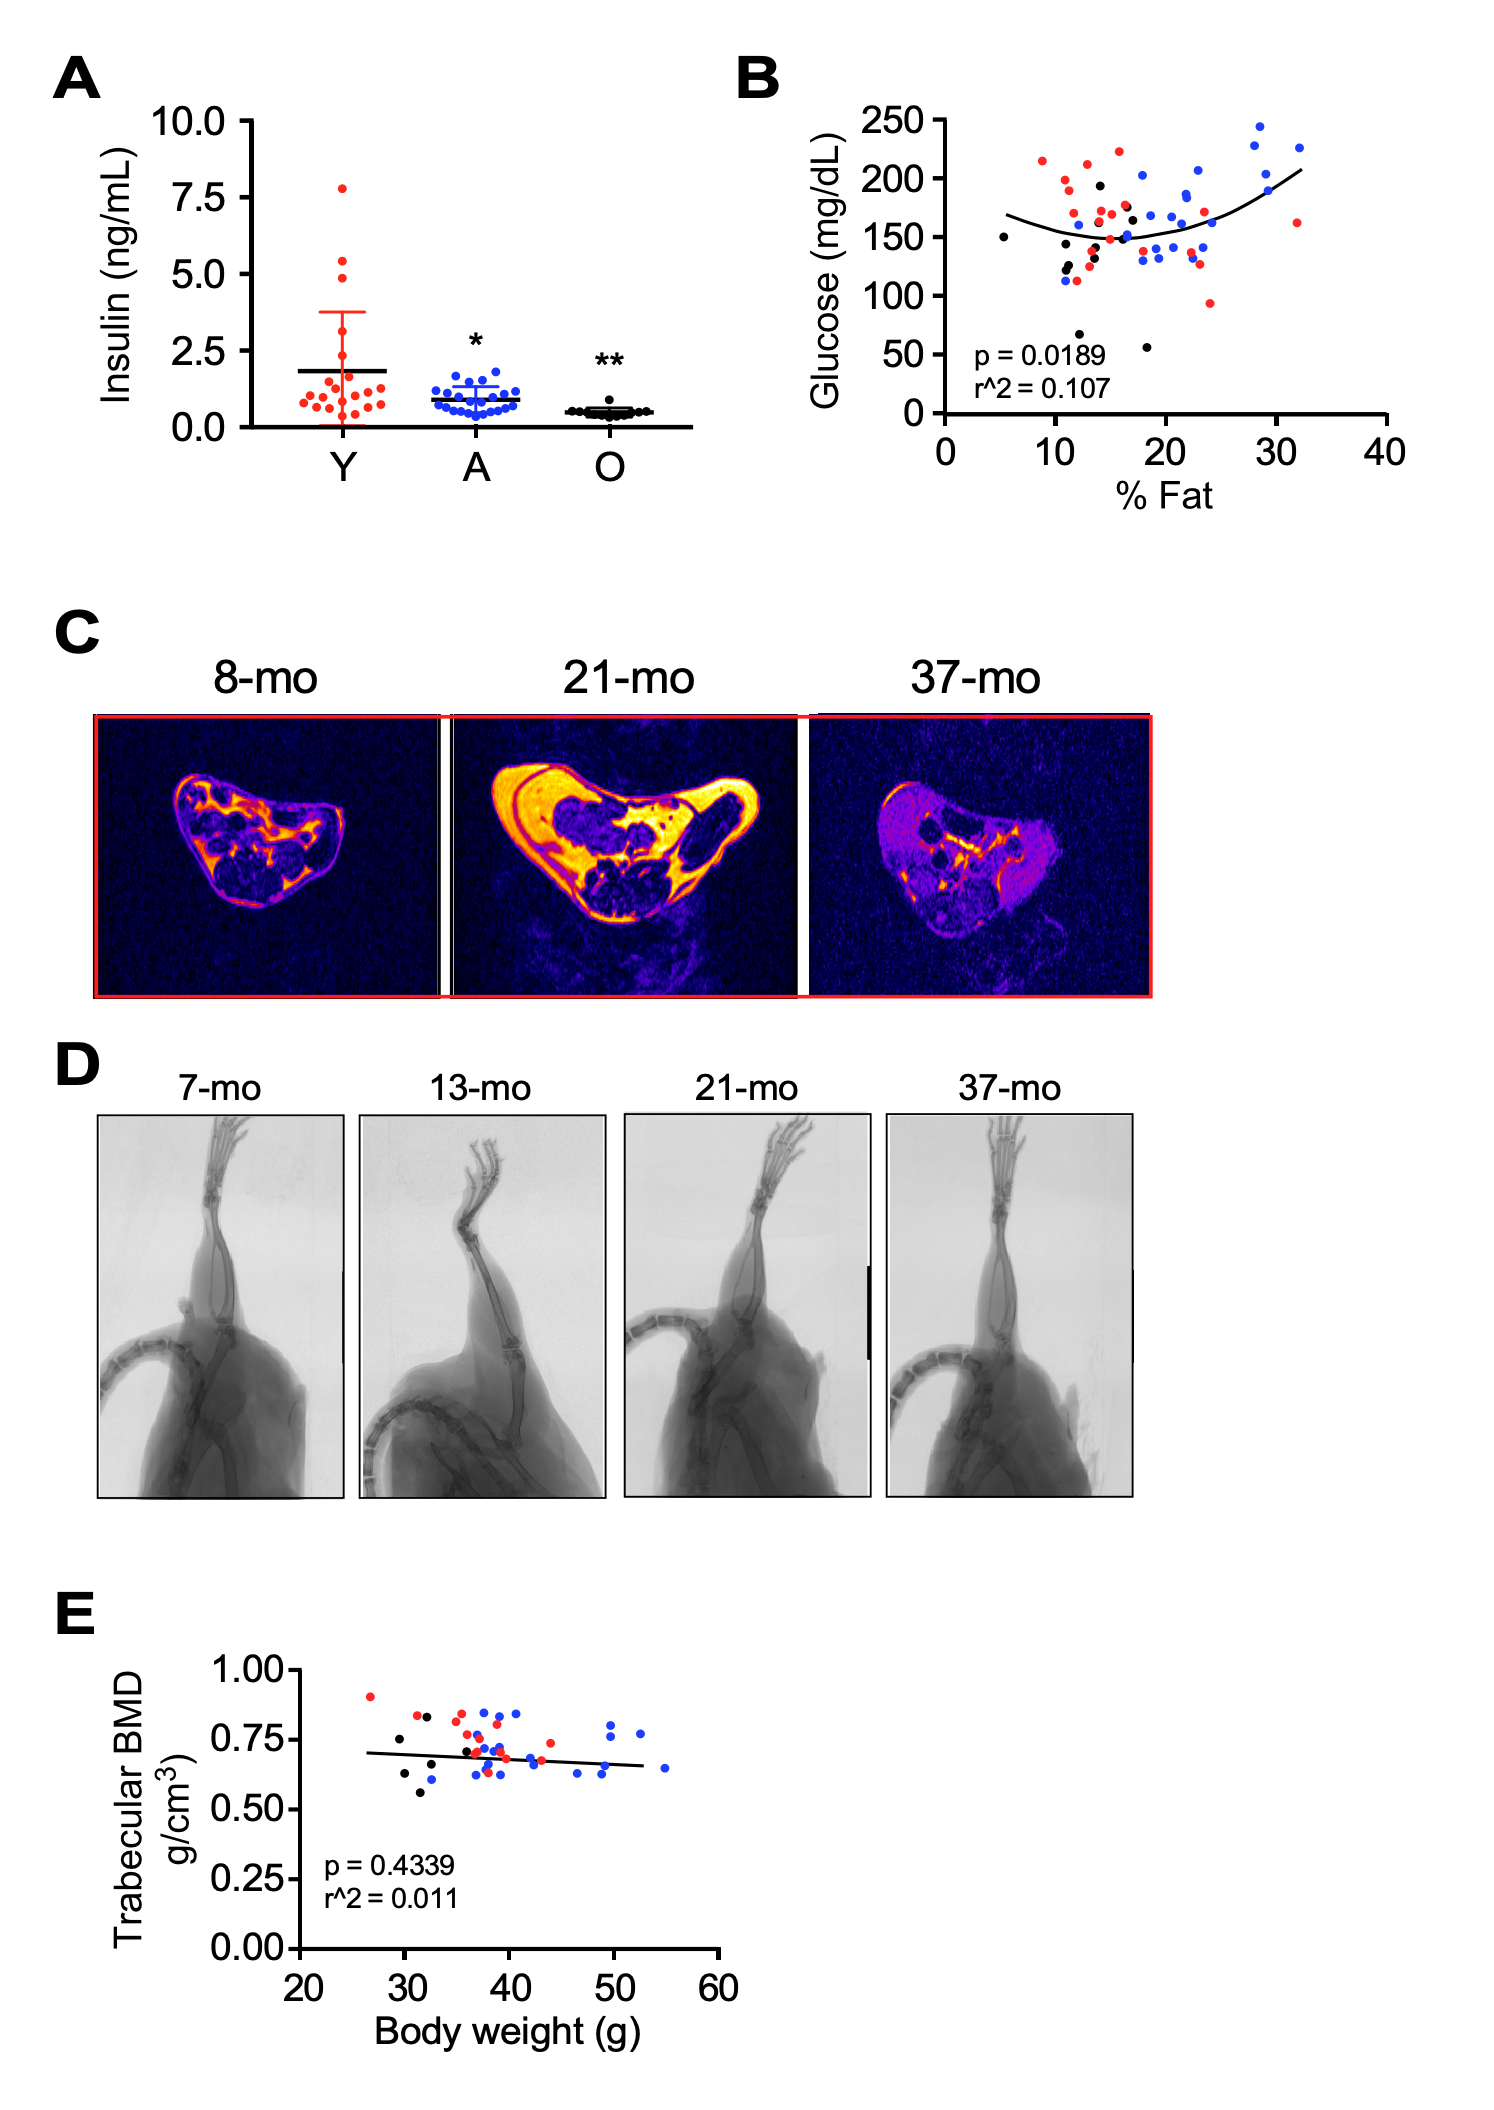

Supplement: supp [file elife-62952-supp-v1.zip › elife_poa_e62952_Figure_1_figure_supplement_1.tif]

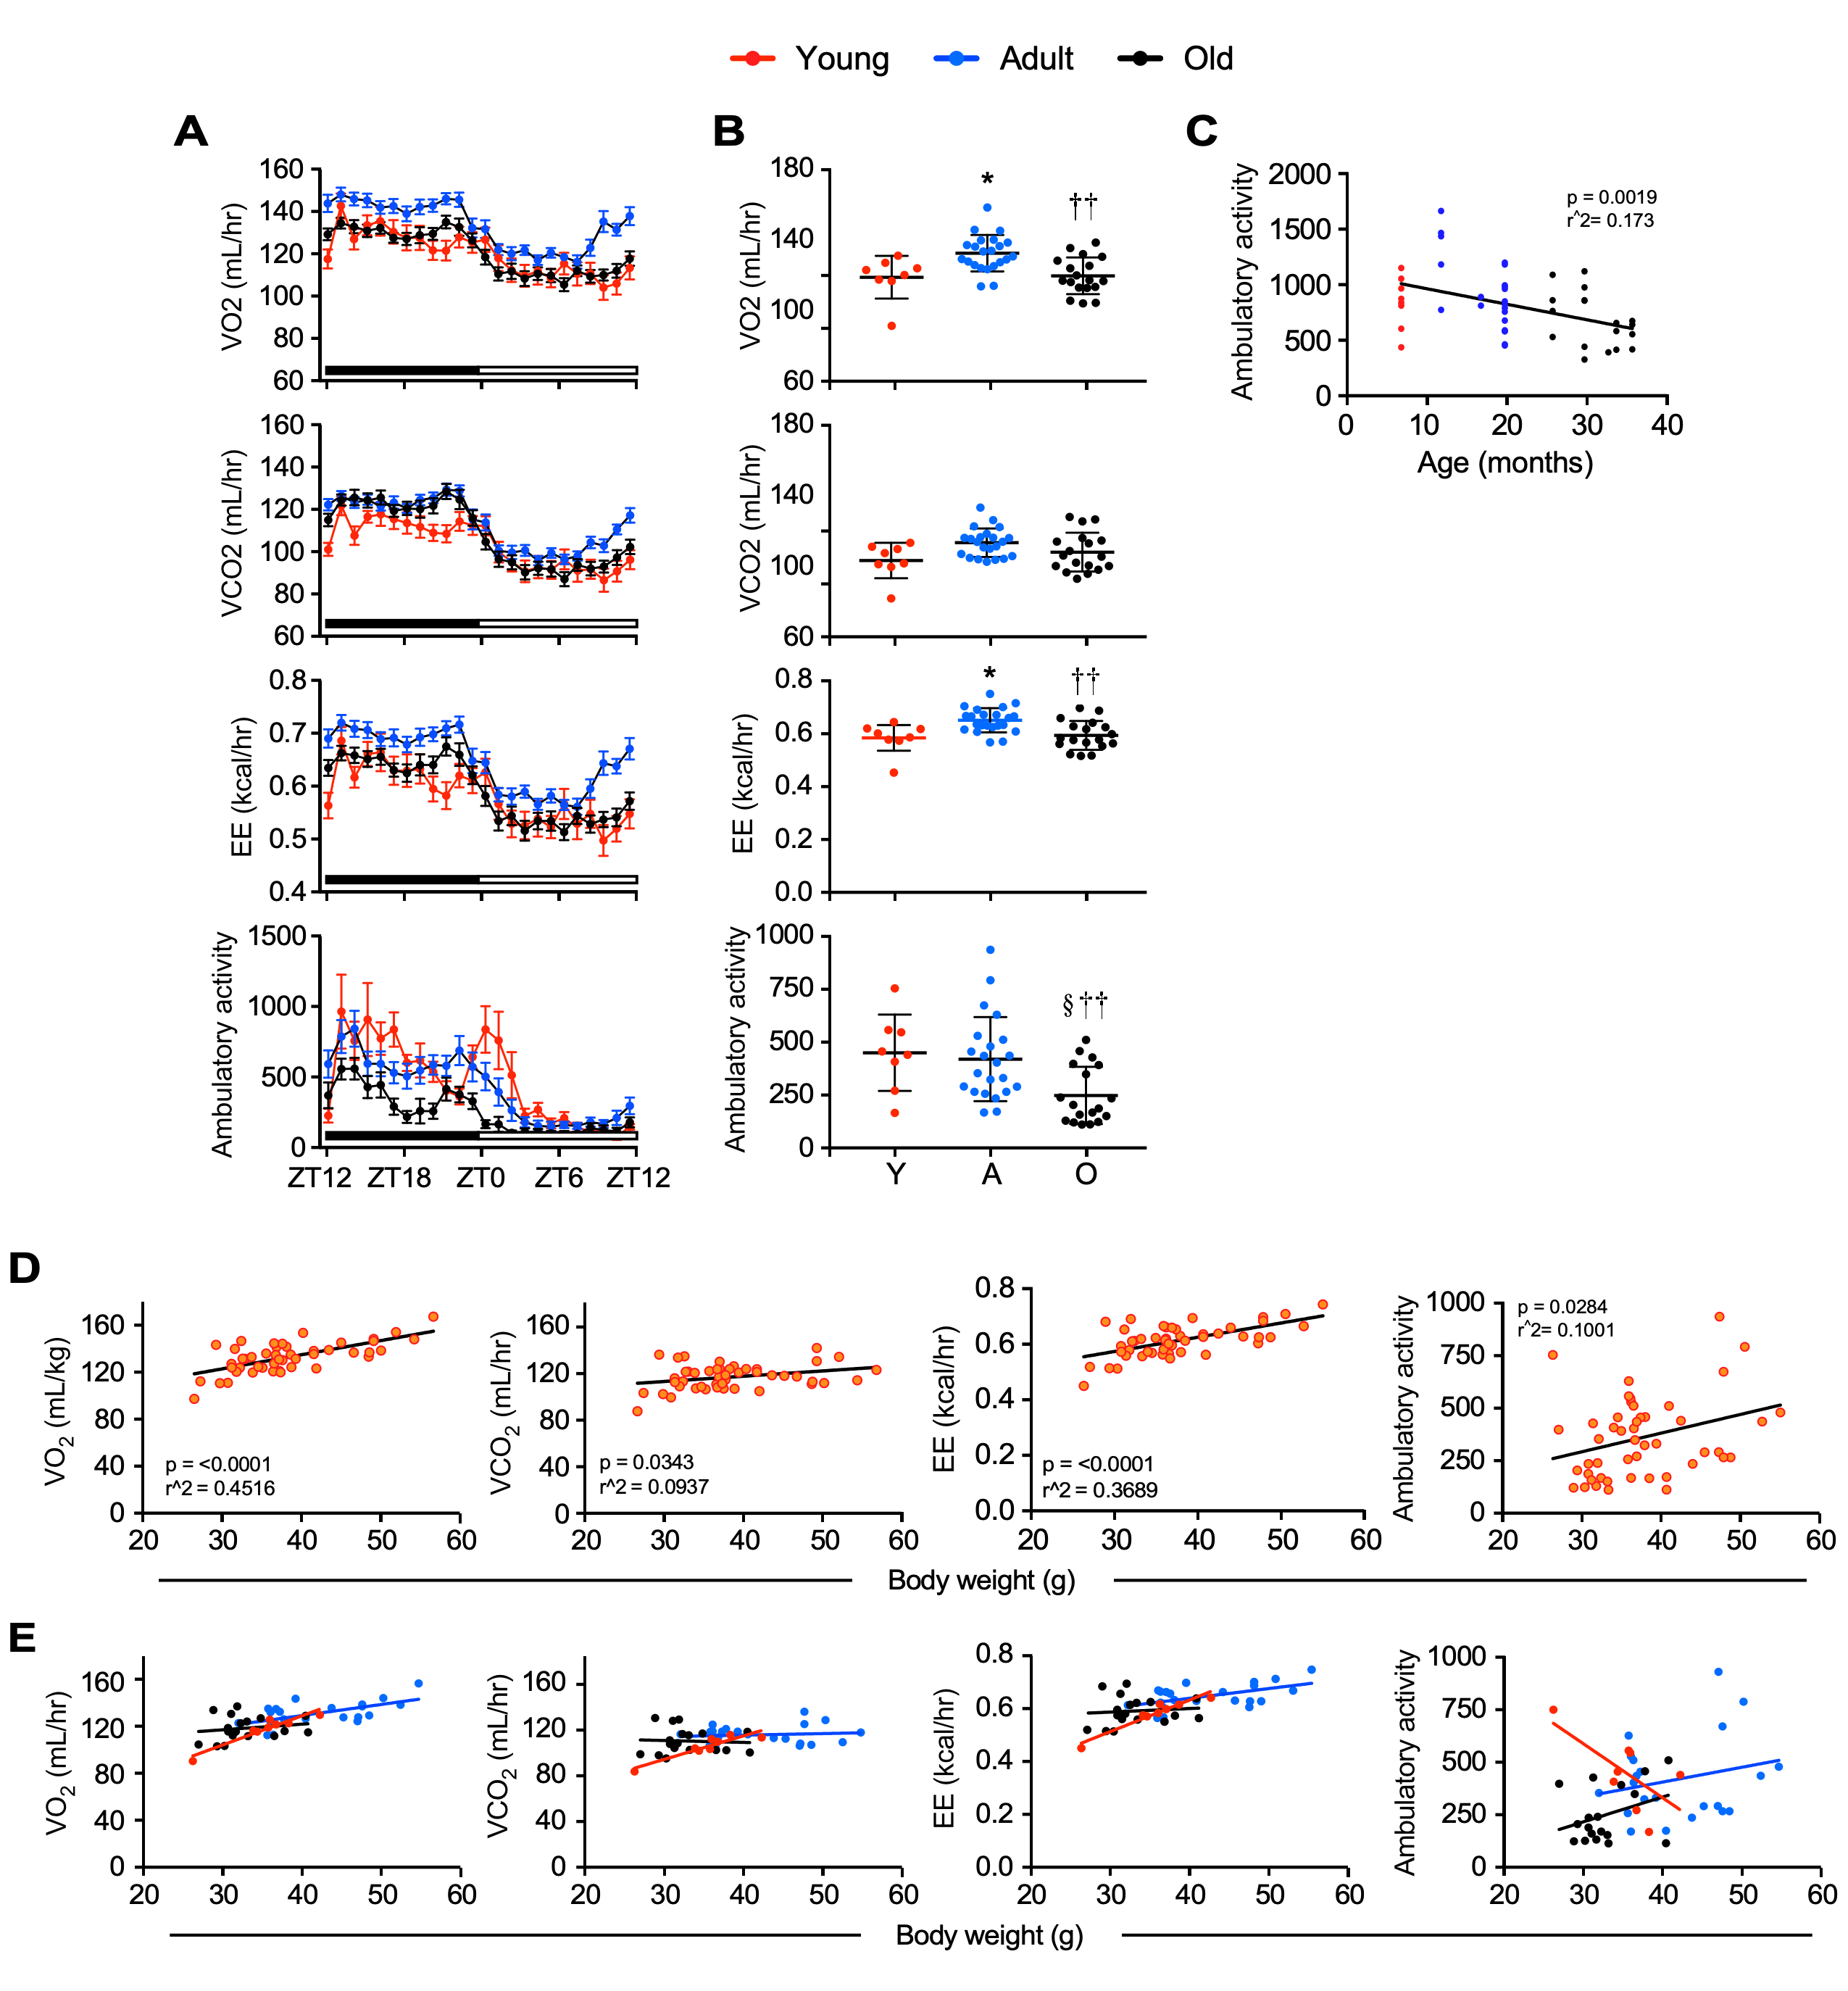

Supplement: supp [file elife-62952-supp-v1.zip › elife_poa_e62952_Figure_2_figure_supplement_1.tif]

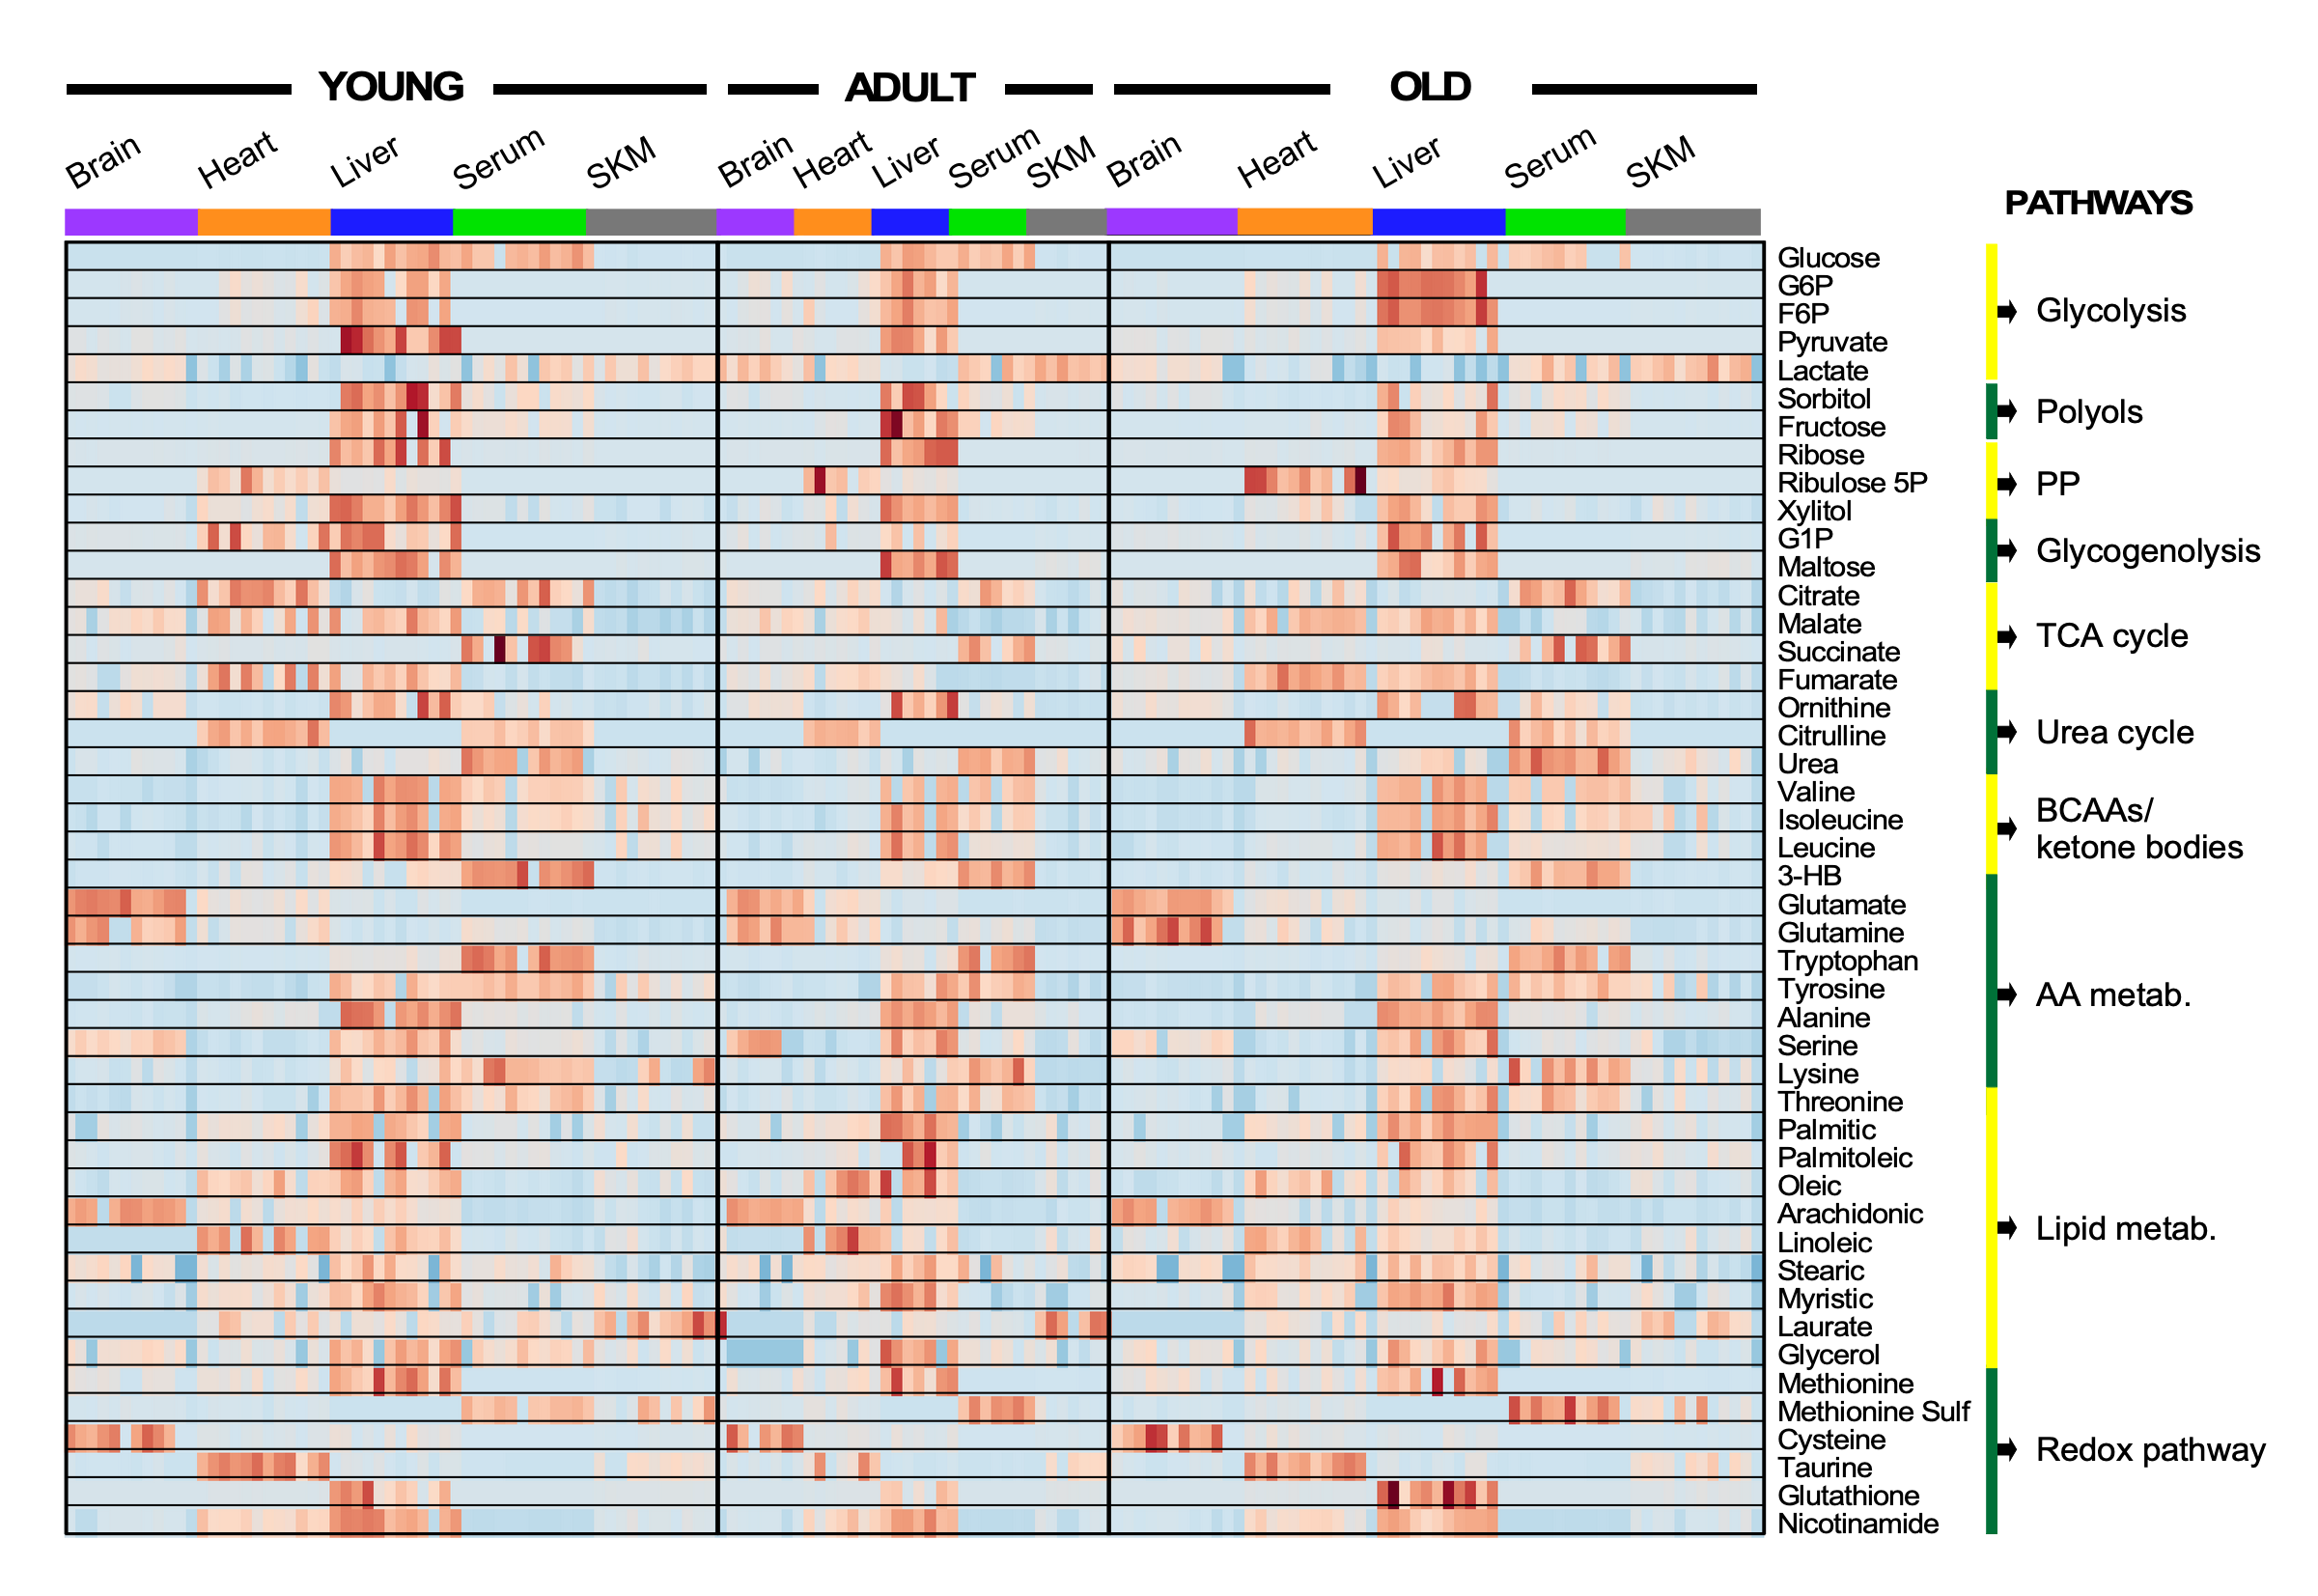

Supplement: supp [file elife-62952-supp-v1.zip › elife_poa_e62952_Figure_3_figure_supplement_1.tif]

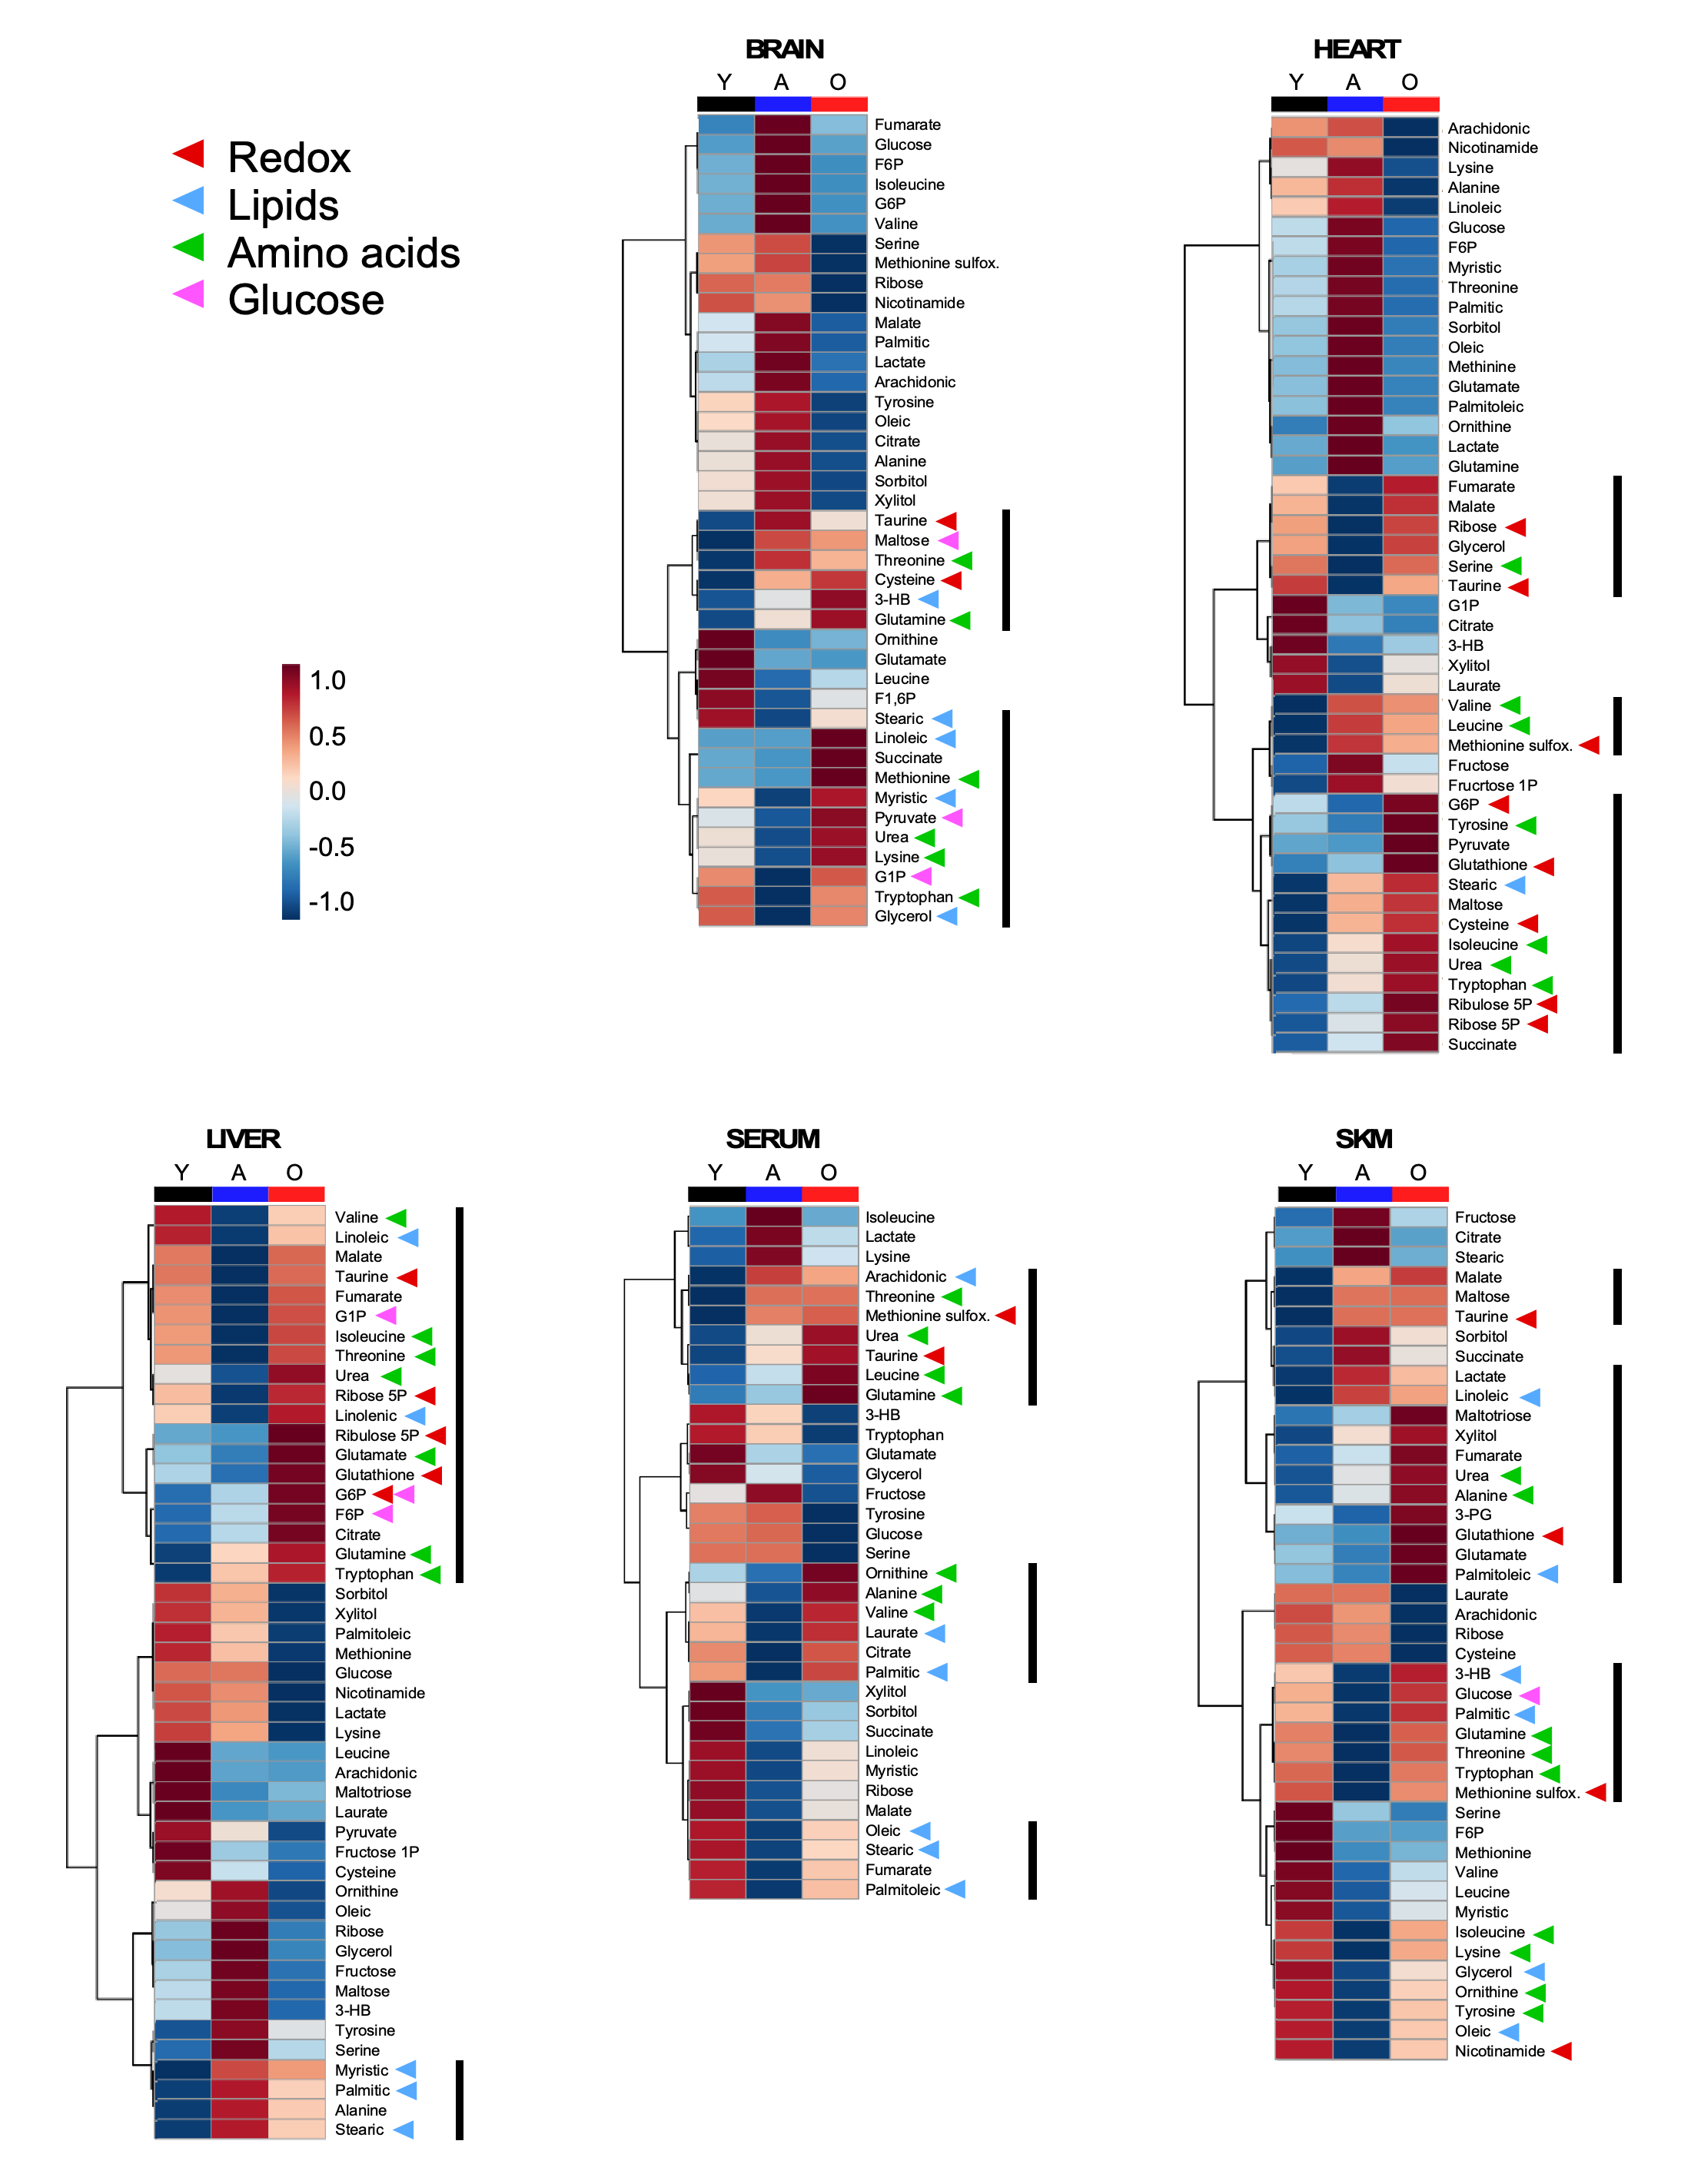

Supplement: supp [file elife-62952-supp-v1.zip › elife_poa_e62952_Figure_4_figure_supplement_1.tif]

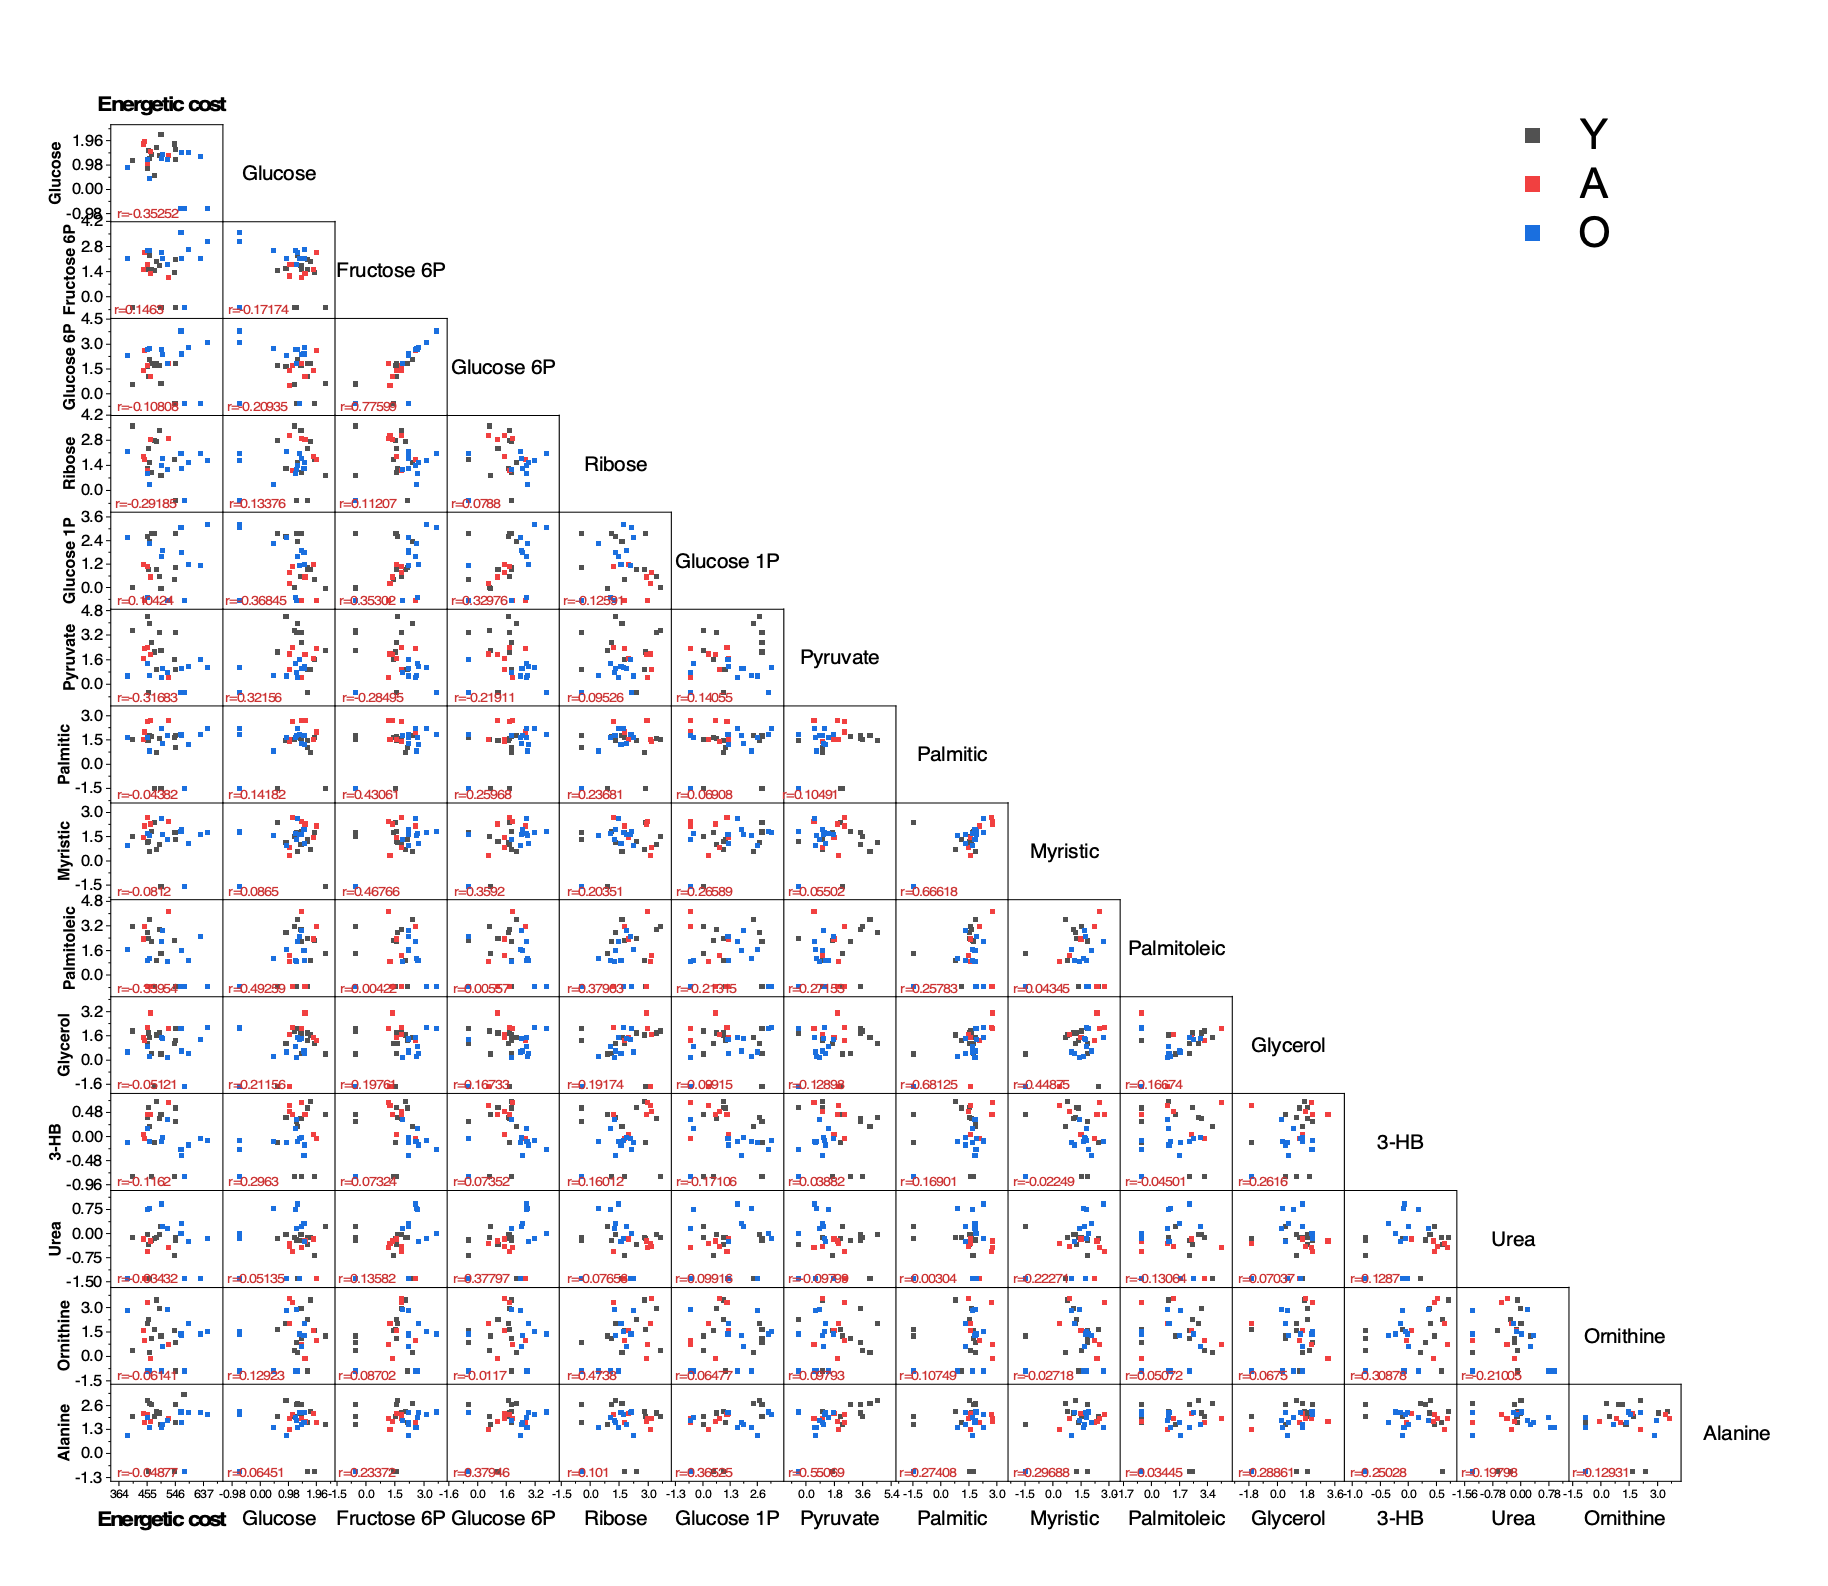

Supplement: supp [file elife-62952-supp-v1.zip › elife_poa_e62952_Figure_6_figure_supplement_1.tif]
